# Supplementary material for: N-3 polyunsaturated fatty acids prevent the d-galactose-induced cognitive impairment by up-regulating the levels of 5-hydroxymethylcytosine in the mouse brain
Source: Royal Society of Chemistry journal article supplement (doi:10.1039/d1fo04420f), 2022-01-01
Supplement: d1fo04420f1.pdf [file d1fo04420f1.pdf]

**Supplemental materials of “N-3 polyunsaturated fatty acids prevent the D-galactose induced cognitive impairment by up-regulating the levels of 5-hydroxymethylcytosine in mouse brain”**

Supplemental Figures S1

Supplemental Figures S2

Supplemental Figures S3

Supplemental Table.1

Supplemental Table.2

Supplemental Table.3

Supplemental Table.4

## Supplemental Figures S1

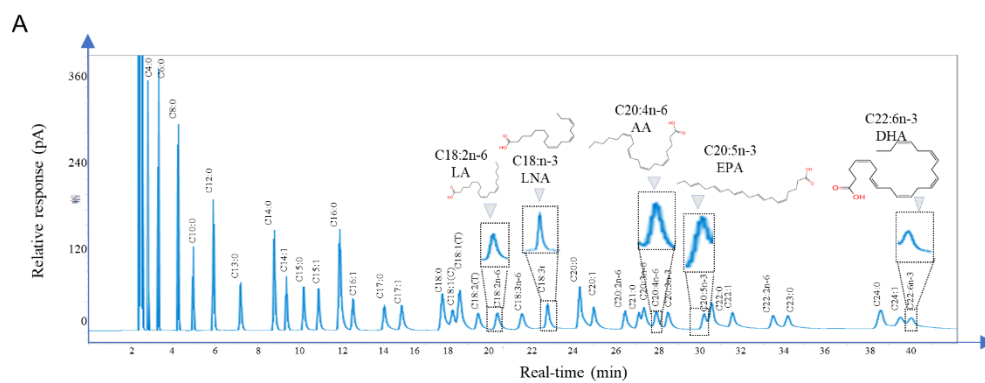

**Figure S1 (A)** Fatty Acid Methyl Ester (FAME) Standards detected by Gas chromatogram. C18:3 LNA and C22:6 DHA's structures are indicated by grey arrows.

## Supplemental Figures S2

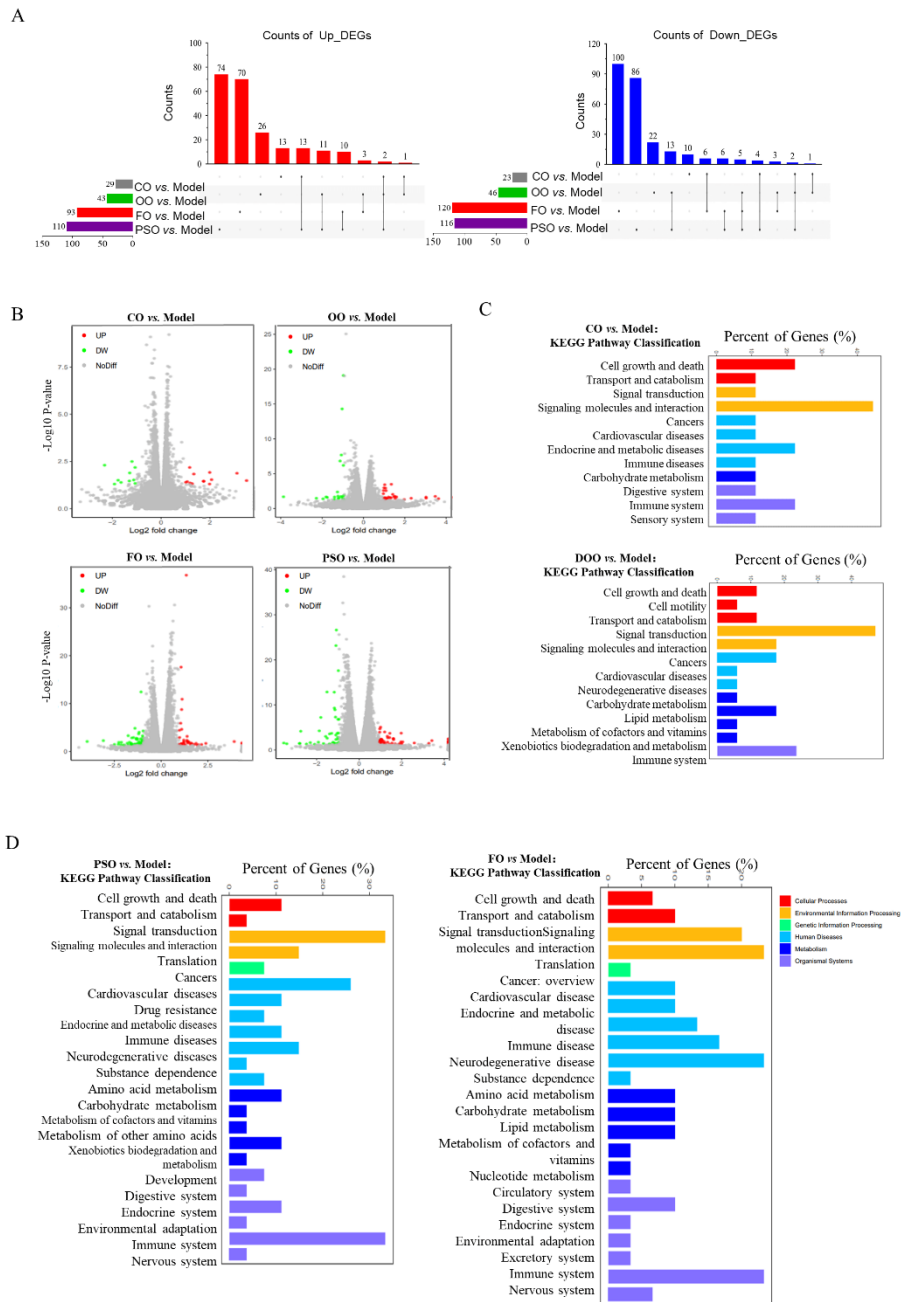

### Supplemental Figures S3

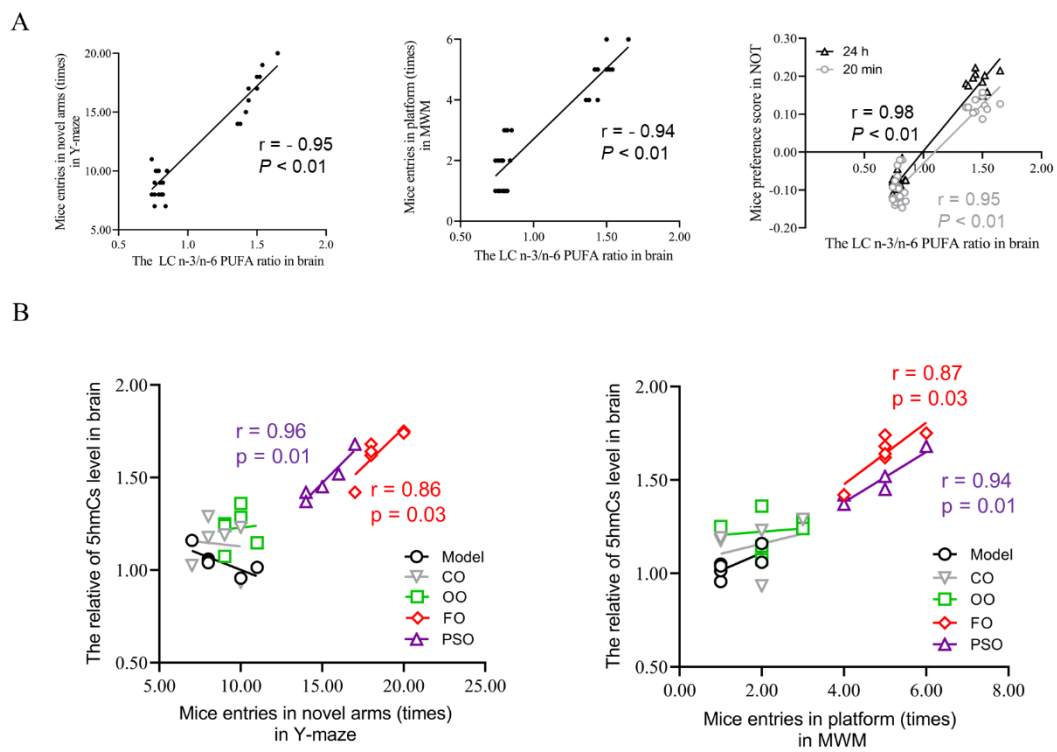

**Figure S3** (A) Correlation of LC n-3/n-6 PUFA ratio in brain (x-axis) and mice behavior preference (y-axis) in the Y-maze, MWM and NOT. (B) Correlation of mice behavior preference in Y-maze, MWM performance (x-axis) with DNA 5hmCs level in brain (y-axis). Pearson's correlation is a measure of a linear correlation in the data,  $n = 5$  or  $6$  mice/group.

Supplemental Table.1 Nutrition ingredients of standard diet

| Ingredient   | g/kg   | kcal/g | kcal% |
|--------------|--------|--------|-------|
| Casein       | 200.00 | 3.58   | 20.36 |
| Corn Starch  | 300.00 | 3.60   | 30.72 |
| Sucrose      | 310.00 | 4      | 35.26 |
| Maltodextrin | 75     | 4      | 8.53  |
| Cellulose    | 47     | 0      | 0     |
| Soybean Oil  | 15     | 9      | 3.83  |
| Mineral Mix  | 11.4   | 0      | 0     |
| Vitamin Mix  | 11.4   | 4      | 1.30  |
| Total        | 969.8  | 28.18  | 100   |

Supplemental Table.2 oils for each oil/diet

|        | Soybean oils | Corn oil | Olive oil | Fish oil | Peony seed oil |
|--------|--------------|----------|-----------|----------|----------------|
| kcal/g | 9.00         | 8.84     | 8.99      | 8.95     | 8.83           |

Supplemental Table.3 Information of target gene's primer

| Gene name     | Sequence ( 5'-> 3')        | Genebank Accession |
|---------------|----------------------------|--------------------|
| <i>Fads1</i>  | F: AGCACATGCCATACAACCATC   | NM_146094          |
|               | R: TTTCCGCTGAACCACAAAATAGA |                    |
| <i>Fads2</i>  | F: TCATCGGACACTATTCGGGAG   | NM_019699          |
|               | R: GGGCCAGCTCACCAATCAG     |                    |
| <i>Elovl2</i> | F: CACGTACCTGCTCTCGATATGG  | NM_019423          |
|               | R: TGTGATTGCGAGGTTATACAAGG |                    |
| <i>Elovl5</i> | F: CAGATCACCGTGCTCCATGTC   | NM_134255          |
|               | R: CTGTTGAGTGTCGCACCAAA    |                    |
| <i>Actb</i>   | F: GGCTGTATTCCCCTCCATCG    | NM_007393          |
|               | R: CCAGTTGGTAACAATGCCATGT  |                    |

Forward primer; R: Reverse primer

Supplemental Table.4 The raw dates of RNA-sequencing analysis

| Samples | RawReads | RawBases | CleanReads | CleanBases | ValidBases | Q30    | GC     |
|---------|----------|----------|------------|------------|------------|--------|--------|
| Model_1 | 49.06M   | 7.36G    | 48.59M     | 7.13G      | 96.84%     | 95.20% | 46.83% |
| Model_2 | 46.99M   | 7.05G    | 46.52M     | 6.79G      | 96.30%     | 95.18% | 46.55% |
| Model_3 | 47.37M   | 7.10G    | 46.91M     | 6.85G      | 96.45%     | 95.31% | 47.04% |
| Model_4 | 47.29M   | 7.09G    | 46.85M     | 6.84G      | 96.42%     | 95.24% | 47.02% |
| CO_1    | 48.64M   | 7.30G    | 48.24M     | 7.01G      | 96.06%     | 95.81% | 47.39% |
| CO_2    | 47.83M   | 7.17G    | 47.44M     | 6.84G      | 95.36%     | 95.85% | 47.29% |
| CO_3    | 48.58M   | 7.29G    | 48.20M     | 6.95G      | 95.37%     | 96.00% | 47.66% |
| CO_4    | 49.83M   | 7.47G    | 49.44M     | 7.16G      | 95.81%     | 95.86% | 47.44% |
| OO_1    | 41.79M   | 6.27G    | 41.38M     | 6.05G      | 96.55%     | 95.34% | 46.27% |
| OO_2    | 47.61M   | 7.14G    | 47.16M     | 6.90G      | 96.57%     | 95.41% | 46.34% |
| OO_3    | 47.58M   | 7.14G    | 47.12M     | 6.86G      | 96.16%     | 95.43% | 46.15% |
| OO_4    | 47.51M   | 7.13G    | 47.04M     | 6.87G      | 96.36%     | 95.46% | 46.34% |
| PSO_1   | 47.95M   | 7.19G    | 47.48M     | 6.92G      | 96.26%     | 95.54% | 46.52% |
| PSO_2   | 47.51M   | 7.13G    | 47.06M     | 6.91G      | 96.96%     | 95.39% | 46.25% |
| PSO_3   | 47.58M   | 7.14G    | 47.12M     | 6.83G      | 95.66%     | 95.52% | 46.67% |
| PSO_4   | 45.77M   | 6.87G    | 45.32M     | 6.59G      | 95.97%     | 95.27% | 46.25% |
| FO_1    | 49.98M   | 7.50G    | 49.47M     | 7.19G      | 95.89%     | 95.43% | 46.53% |
| FO_2    | 47.98M   | 7.20G    | 47.51M     | 6.94G      | 96.40%     | 95.30% | 46.71% |
| FO_3    | 48.82M   | 7.32G    | 48.33M     | 7.03G      | 96.02%     | 95.10% | 46.79% |
| FO_4    | 51.71M   | 7.76G    | 51.19M     | 7.45G      | 96.02%     | 95.34% | 46.54% |

Note: Q30 notes the sequencing error recognition rate was 0.1%.
